# Supplementary material
Source: HighWire-hosted journal article supplement (https://bmjopen.bmj.com/content/11/9/e046713)
Supplement: inline-supplementary-material-1 [file inline-supplementary-material-1.pdf]

1 Appendix 1: CPRD GOLD Coverage

2  
3 The CPRD was established in 1987 and is a not-for-profit research service funded by the NHS  
4 National Institute for Health Research (NIHR) and the Medicines and Healthcare products  
5 Regulatory Agency (MHRA). It is now owned by the UK Department of Health. CPRD collects  
6 data from GP practices using Vision systems, with approximately 718 in total. The  
7 nomenclature of the CPRD has evolved over time: originally termed the General Practice  
8 Research Database (GPRD), until it was launched as the CPRD in 2012. It is now termed  
9 CPRD GOLD, to differentiate it from a recently launched 'sister' database CPRD Aurum that  
10 collects data from GP practices using EMIS Web software. Henceforth, use of the term CPRD  
11 refers to CPRD GOLD. CPRD contains the records of 17 million patients, of which 4.4 million  
12 are active, covering approximately 7% of the UK population (1). Importantly, CPRD patients  
13 are broadly representative of the UK population in terms of age, sex, ethnicity and body  
14 mass index distribution (2).

15  
16  
17 1. Clinical Practice Research Datalink. <https://www.cprd.com/intro.asp>.

18  
19 2. Herrett E, Gallagher AM, Bhaskaran K, et al. Data Resource Profile: Clinical Practice  
20 Research Datalink (CPRD). *Int J Epidemiol*. 2015;44(3):827-836. doi:10.1093/ije/dyv098

1

2 **Appendix 2: Read codes for hip OA**

3 1. N053512 Hip OA NOS

4 2. N05z511 Hip OA NOS

5 3. N05zJ00 OA NOS, of hip

6 4. Nyu2100 [X]Other primary coxarthrosis

7 5. N051900 Primary coxarthrosis, bilateral

8

**Appendix 3: Disorders covered by the Quality and Outcomes Framework (QOF).**

1. asthma
2. atrial fibrillation
3. hypertension
4. cancer
5. chronic kidney disease
6. COPD
7. Dementia
8. Depression
9. diabetes,
10. epilepsy
11. heart failure
12. learning disability
13. mental health disorder
14. osteoporosis
15. peripheral arterial disease
16. rheumatoid arthritis
17. stroke and TIA
