# Supplementary material
Source: HighWire-hosted journal article supplement (https://bmjopen.bmj.com/content/11/9/e046713)
Supplement: inline-supplementary-material-7 [file inline-supplementary-material-7.pdf]

Supplementary Table 1: Mean time to surgery by morbidity category

|                                     | Category | Mean time to surgery (years) |
|-------------------------------------|----------|------------------------------|
| Charlson Comorbidity Index          | 0        | 1.46                         |
|                                     | 1        | 1.52                         |
|                                     | 2        | 1.19                         |
|                                     | 3+       | 1.10                         |
| Count of chronic diseases           | 0        | 1.57                         |
|                                     | 1        | 1.40                         |
|                                     | 2        | 1.28                         |
|                                     | 3+       | 1.10                         |
| Count of medications prescribed     | 0-4      | 1.60                         |
|                                     | 5-7      | 1.36                         |
|                                     | 8-12     | 1.21                         |
|                                     | 13+      | 1.17                         |
| Count of contacts with primary care | 0-7      | 1.52                         |
|                                     | 8-11     | 1.40                         |
|                                     | 12-17    | 1.31                         |
|                                     | 18+      | 1.25                         |
| Electronic Frailty Index            | 0-4      | 1.49                         |
|                                     | 5-8      | 1.18                         |
|                                     | 9-12     | 0.99                         |
|                                     | 13+      | 1.12                         |

Supplementary Table 2: THA surgery rates by Morbidity Status based on HES recorded surgery

| Morbidity scale                     | Category | Total at risk | Competing events | THR events | Unadjusted HR (95% CI) | Adjusted HR* (95% CI) |
|-------------------------------------|----------|---------------|------------------|------------|------------------------|-----------------------|
| Charlson Comorbidity Index          | 0        | 10,980        | 1,992            | 4,552      | Ref                    | Ref                   |
|                                     | 1        | 2,037         | 584              | 703        | 0.79 (0.73-0.86)       | 0.85 (0.78-0.92)      |
|                                     | 2        | 2,034         | 466              | 707        | 0.86 (0.79-0.93)       | 0.85 (0.78-0.92)      |
|                                     | 3+       | 1,732         | 495              | 525        | 0.72 (0.65-0.78)       | 0.68 (0.62-0.75)      |
| Count of chronic diseases           | 0        | 5,559         | 1,059            | 2,412      | Ref                    | Ref                   |
|                                     | 1        | 5,280         | 1,069            | 2,150      | 0.97 (0.91-1.03)       | 0.93 (0.88-0.98)      |
|                                     | 2        | 3,306         | 724              | 1,182      | 0.86 (0.80-0.92)       | 0.81 (0.76-0.87)      |
|                                     | 3+       | 2,638         | 685              | 743        | 0.68 (0.63-0.74)       | 0.63 (0.58-0.69)      |
| Count of medications                | 0-4      | 6,192         | 1,138            | 2,695      | Ref                    | Ref                   |
|                                     | 5-7      | 4,445         | 941              | 1,759      | 0.94 (0.89-1.00)       | 0.94 (0.89-1.00)      |
|                                     | 8-12     | 4,188         | 943              | 1,474      | 0.85 (0.80-0.90)       | 0.83 (0.78-0.89)      |
|                                     | 13+      | 1,958         | 515              | 559        | 0.70 (0.64-0.76)       | 0.66 (0.60-0.73)      |
| Count of contacts with primary care | 0-7      | 7,004         | 1,389            | 2,896      | Ref                    | Ref                   |
|                                     | 8-11     | 3,817         | 734              | 1,473      | 0.96 (0.90-1.02)       | 0.95 (0.89-1.01)      |
|                                     | 12-17    | 3,194         | 684              | 1,186      | 0.93 (0.87-0.99)       | 0.92 (0.85-0.98)      |
|                                     | 18+      | 2,968         | 730              | 932        | 0.84 (0.78-0.90)       | 0.83 (0.77-0.89)      |
| Electronic Frailty Index            | 0-4      | 11,318        | 2,239            | 4,793      | Ref                    | Ref                   |
|                                     | 5-8      | 4,426         | 986              | 1,468      | 0.82 (0.77-0.87)       | 0.78 (0.73-0.83)      |
|                                     | 9-12     | 920           | 266              | 209        | 0.55 (0.48-0.64)       | 0.54 (0.47-0.63)      |
|                                     | 13+      | 119           | 46               | 17         | 0.35 (0.22-0.57)       | 0.34 (0.21-0.55)      |
| <b>Total</b>                        |          | 16,783        | 3,537            | 6,487      |                        |                       |
